# Supplementary material for: Comprehensive Analysis of Cytomegalovirus pp65 Antigen-Specific CD8+ T Cell Responses According to Human Leukocyte Antigen Class I Allotypes and Intraindividual Dominance
Source: PubMed Central journal article supplement (PMC5702484; doi:10.3389/fimmu.2017.01591), 2017-11-21
Supplement: image_2.pdf [file image_2.pdf]

## *Supplementary Material*

# **Comprehensive Analysis of CMV pp65 Antigen-Specific CD8<sup>+</sup> T Cell Responses According to HLA Class I Allotypes and Intra-Individual Dominance**

**Seung-Joo Hyun<sup>1</sup>, Hyun-Jung Sohn<sup>2</sup>, Hyun-Joo Lee<sup>2</sup>, Seon-Duk Lee<sup>2</sup>, Sueon Kim<sup>1</sup>, Dae-Hee Sohn<sup>1</sup>, Cheol-Hwa Hong<sup>1</sup>, Haeyoun Choi<sup>1</sup>, Hyun-Il Cho<sup>2,3</sup> and Tai-Gyu Kim<sup>1,2,3\*</sup>**

<sup>1</sup>Department of Microbiology, College of Medicine, The Catholic University of Korea, Seoul, Korea,

<sup>2</sup>Catholic Hematopoietic Stem Cell Bank, College of Medicine, The Catholic University of Korea, Seoul, Korea,

<sup>3</sup>Cancer Research Institute, College of Medicine, The Catholic University of Korea, Seoul, Korea

\* **Correspondence:** Tai-Gyu Kim: [kimtg@catholic.ac.kr](mailto:kimtg@catholic.ac.kr)

## **1 Supplementary Data**

## 2 Supplementary Figures and Tables

### 2.1 Supplementary Figures

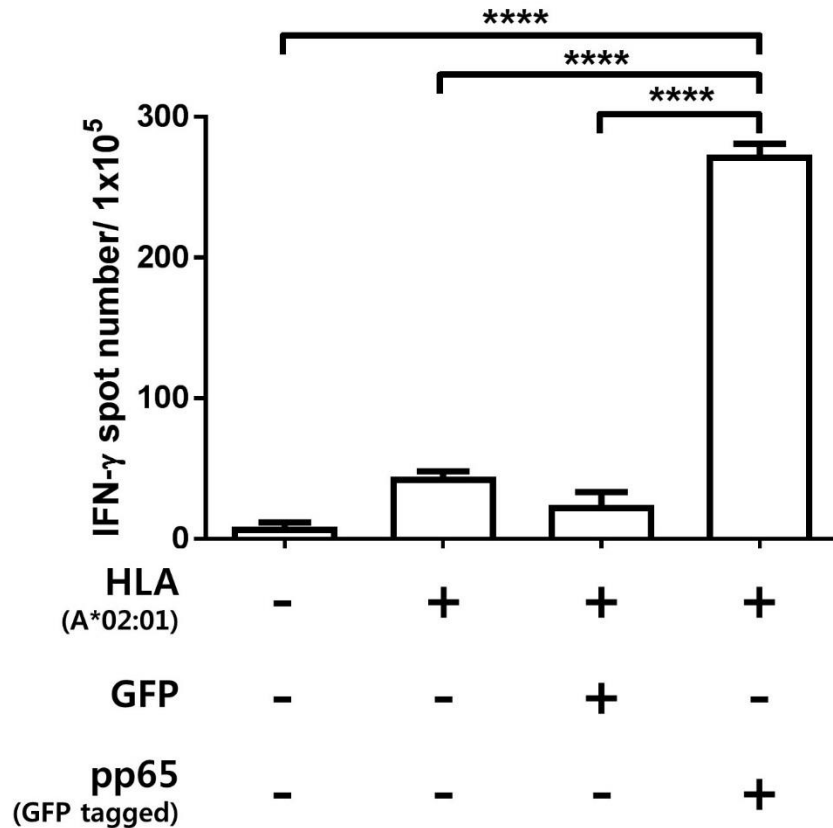

#### Supplementary Figure 2. Differences in immune responses between GFP and GFP tagged pp65

GFP and GFP-tagged pp65 were used to confirm whether the immune response was caused by GFP. To measure the immune response, the HLA-A\*02:01 allotype was transiently expressed in established aAPCs and then GFP and GFP-tagged pp65 were additionally expressed. Immune response was measured by ELISPOT assay and three independent experiments were performed. P values were calculated by 1-way ANOVA (\*P < 0.05; \*\*P < 0.01; \*\*\*P < 0.001; \*\*\*\*P < 0.0001).
