# Supplementary material for: Comprehensive Analysis of Cytomegalovirus pp65 Antigen-Specific CD8+ T Cell Responses According to Human Leukocyte Antigen Class I Allotypes and Intraindividual Dominance
Source: PubMed Central journal article supplement (PMC5702484; doi:10.3389/fimmu.2017.01591), 2017-11-21
Supplement: image_4.pdf [file image_4.pdf]

## *Supplementary Material*

# **Comprehensive Analysis of CMV pp65 Antigen-Specific CD8<sup>+</sup> T Cell Responses According to HLA Class I Allotypes and Intra-Individual Dominance**

**Seung-Joo Hyun<sup>1</sup>, Hyun-Jung Sohn<sup>2</sup>, Hyun-Joo Lee<sup>2</sup>, Seon-Duk Lee<sup>2</sup>, Sueon Kim<sup>1</sup>, Dae-Hee Sohn<sup>1</sup>, Cheol-Hwa Hong<sup>1</sup>, Haeyoun Choi<sup>1</sup>, Hyun-Il Cho<sup>2,3</sup> and Tai-Gyu Kim<sup>1,2,3\*</sup>**

<sup>1</sup>Department of Microbiology, College of Medicine, The Catholic University of Korea, Seoul, Korea,

<sup>2</sup>Catholic Hematopoietic Stem Cell Bank, College of Medicine, The Catholic University of Korea, Seoul, Korea,

<sup>3</sup>Cancer Research Institute, College of Medicine, The Catholic University of Korea, Seoul, Korea

\* **Correspondence:** Tai-Gyu Kim: [kimtg@catholic.ac.kr](mailto:kimtg@catholic.ac.kr)

## **1 Supplementary Data**

## 2 Supplementary Figures and Tables

### 2.1 Supplementary Figures

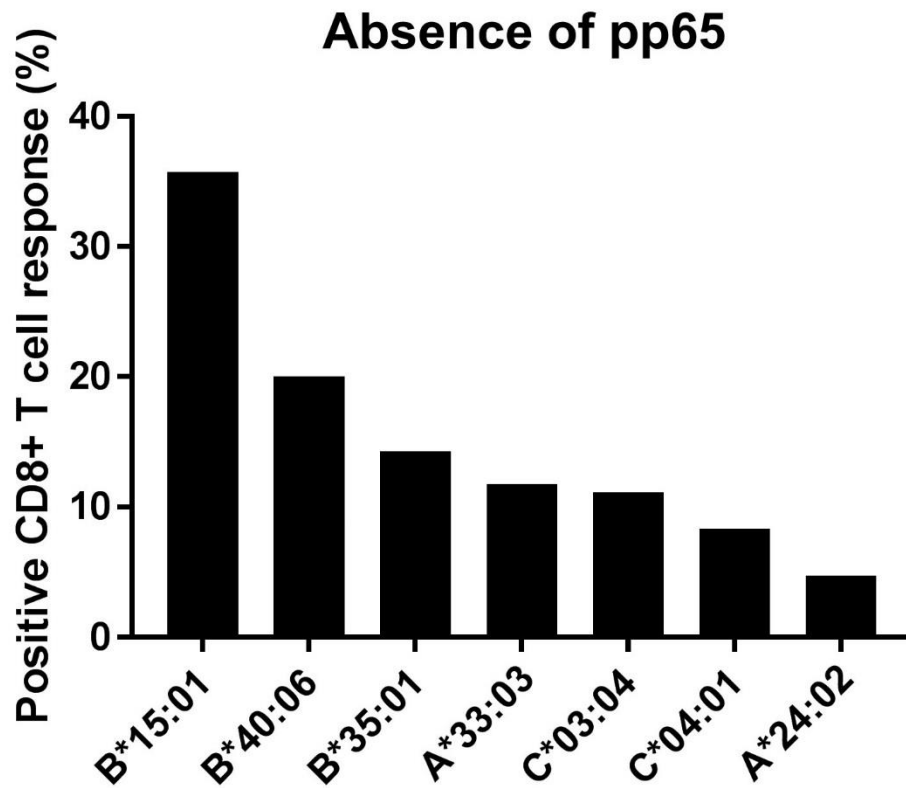

**Supplementary Figure 4. HLA-specific CD8<sup>+</sup> T cell response without pp65**

Specific CD8<sup>+</sup> T cell responses were observed in 7 HLA allotypes without pp65. Seven allotypes show strong immune responses more than 100 spots /  $5 \times 10^5$  CD8<sup>+</sup> T cells, among them, three allotypes in HLA-B, and two allotypes in HLA-A and -C, respectively. HLA-B\*15:01 showed a strong positive CD8<sup>+</sup> T cell response of more than 35%.
